# Supplementary material for: Colorectal Cancer Genetic Heterogeneity Delineated by Multi-Region Sequencing
Source: PubMed Central journal article supplement (PMC4811559; doi:10.1371/journal.pone.0152673), 2016-03-29
Supplement: pone.0152673.s001.pdf [file pone.0152673.s001.pdf]

OncoGxOne™ Plus (333)

|          |         |        |          |         |         |         |          |
|----------|---------|--------|----------|---------|---------|---------|----------|
| ABL1     | CARD11  | DIS3   | FGF7     | JAK2    | MYCL    | PNRC1   | SOX2     |
| ACVR1B   | CASP8   | DNMT1  | FGFR1    | JAK3    | MYCN    | PPP2R1A | SOX9     |
| AKT1     | CBFB    | DNMT3A | FGFR2    | JUN     | MYD88   | PRDM1   | SPEN     |
| AKT2     | CBL     | DOT1L  | FGFR3    | KAT6A   | NBN     | PRKAR1A | SPOP     |
| AKT3     | CCND1   | DPYD   | FGFR4    | KDM5A   | NCOA3   | PRKDC   | SRC      |
| ALK      | CCND2   | EGFR   | FLT1     | KDM5C   | NCOR1   | PRSS8   | SRSF2    |
| ALOX12B  | CCND3   | ELF3   | FLT3     | KDM6A   | NF1     | PTCH1   | STAG2    |
| AMER1    | CCNE1   | EP300  | FLT4     | KDR     | NF2     | PTEN    | STAT1    |
| APC      | CD79A   | EPHA3  | FOXL2    | KEAP1   | NFE2L2  | PTPN11  | STAT3    |
| APCDD1   | CD79B   | EPHA5  | FUBP1    | KIT     | NFKBIA  | RAD50   | STAT4    |
| AR       | CDC73   | EPHB1  | GATA1    | KMT2A   | NKX2-1  | RAD51   | STK11    |
| ARAF     | CDH1    | EPOR   | GATA2    | KMT2C   | NOTCH1  | RAD51B  | SUFU     |
| ARFRP1   | CDK12   | ERBB2  | GATA3    | KMT2D   | NOTCH2  | RAD51C  | SYK      |
| ARID1A   | CDK4    | ERBB3  | GID4     | KLF4    | NOTCH3  | RAD51D  | TBX3     |
| ARID1B   | CDK6    | ERBB4  | GNA11    | KLHL6   | NOTCH4  | RAD52   | TET2     |
| ARID2    | CDK8    | ERG    | GNA13    | KRAS    | NPM1    | RAD54L  | TGFBR2   |
| ASXL1    | CDKN1B  | ESR1   | GNAQ     | LMO1    | NRAS    | RAF1    | TIPARP   |
| ATM      | CDKN2A  | ETV1   | GNAS     | LRP1B   | NSD1    | RARA    | TMPRSS2  |
| ATR      | CDKN2B  | ETV4   | GPR124   | MAML1   | NTRK1   | RB1     | TNFAIP3  |
| ATRX     | CDKN2C  | ETV5   | GRIN2A   | MAP2K1  | NTRK2   | REL     | TNFRSF14 |
| AURKA    | CEBPA   | ETV6   | GSK3B    | MAP2K2  | NTRK3   | RET     | TOP1     |
| AURKB    | CHEK1   | EWSR1  | H3F3A    | MAP2K4  | NUP93   | RICTOR  | TP53     |
| AXIN1    | CHEK2   | EZH2   | HGF      | MAP3K1  | PAK3    | RNF43   | TPMT     |
| AXL      | CHUK    | FAM46C | HIST1H3B | MAP3K13 | PAK7    | ROS1    | TRAF7    |
| B2M      | CIC     | FANCA  | HLA-A    | MAPK1   | PALB2   | RPA1    | TRRAP    |
| BACH1    | CRBN    | FANCC  | HLA-B    | MCL1    | PARP1   | RPTOR   | TSC1     |
| BAP1     | CREBBP  | FANCD2 | HLA-C    | MDM2    | PARP2   | RUNX1   | TSC2     |
| BARD1    | CRKL    | FANCE  | HNF1A    | MDM4    | PARP3   | RUNX1T1 | TSHR     |
| BCL2     | CRLF2   | FANCF  | HRAS     | MED12   | PARP4   | SETBP1  | TYMS     |
| BCL2L2   | CSF1R   | FANCG  | IDH1     | MEF2B   | PAX5    | SETD2   | U2AF1    |
| BCL6     | CTCF    | FANCI  | IDH2     | MEN1    | PBRM1   | SF3B1   | UGT1A1   |
| BCOR     | CTNNA1  | FANCL  | IGF1     | MET     | PDGFRA  | SH2B3   | VHL      |
| BCORL1   | CTNNB1  | FANCM  | IGF1R    | MITF    | PDGFRB  | SKP2    | WISP3    |
| BCR      | CUL4A   | FAT3   | IGF2     | MLH1    | PDK1    | SMAD2   | WT1      |
| BLM      | CUL4B   | FBXW7  | IGF2R    | MPL     | PHF6    | SMAD3   | XPO1     |
| BRAF     | CUX1    | FGF10  | IKBKE    | MRE11A  | PIK3C2G | SMAD4   | XRCC1    |
| BRCA1    | CYLD    | FGF14  | IKZF1    | MSH2    | PIK3C3  | SMARCA4 | XRCC3    |
| BRCA2    | CYP17A1 | FGF19  | IL7R     | MSH6    | PIK3CA  | SMARCB1 | ZNF217   |
| BRIP1    | CYP2C8  | FGF23  | INHBA    | MTHFR   | PIK3CG  | SMARCD1 | ZNF703   |
| BTG1     | CYP2D6  | FGF3   | IRF4     | MTOR    | PIK3R1  | SMO     |          |
| BTK      | DAXX    | FGF4   | IRS2     | MUTYH   | PIK3R2  | SOCS1   |          |
| C11orf30 | DDR2    | FGF6   | JAK1     | MYC     | PMS2    | SOX10   |          |
